# Supplementary material for: On the assignment of19F MAS NMR spectra of fluoroaluminates using through-space spectral edition of19F–27Al and19F–19F connectivities
Source: Royal Society of Chemistry journal article supplement (doi:10.1039/b812091a), 2008-12-09
Supplement: b812091a.pdf [file b812091a.pdf]

# On the assignment of $^{19}\text{F}$ MAS NMR spectra of fluoroaluminates using through-space spectral edition of $^{19}\text{F}$ - $^{27}\text{Al}$ and $^{19}\text{F}$ - $^{19}\text{F}$ connectivities

Charlotte Martineau, Christophe Legein, Jean-Yves Buzaré, Franck Fayon

## Electronic Supplementary Information

### Table of content

|                                                                                                                                                             |   |
|-------------------------------------------------------------------------------------------------------------------------------------------------------------|---|
| <b>Table 1.</b> F-F distances ( $d_{\text{F-F}} < 3.6 \text{ \AA}$ ) calculated from the optimized structure of $\beta\text{-BaAlF}_5$ .....                | 2 |
| <b>Table 2.</b> F-F distances ( $d_{\text{F-F}} < 3.6 \text{ \AA}$ ) calculated from the optimized structure of $\text{Ba}_3\text{Al}_2\text{F}_{12}$ ..... | 4 |
| <b>Table 3.</b> F-F distances ( $d_{\text{F-F}} < 3.6 \text{ \AA}$ ) calculated from the optimized structure of $\alpha\text{-CaAlF}_5$ .....               | 5 |
| <b>Reference</b> .....                                                                                                                                      | 5 |

**Table 1.** F-F distances ( $d_{F-F} < 3.6 \text{ \AA}$ ) calculated from the optimized structure of  $\beta$ -BaAlF<sub>5</sub>.<sup>1</sup>

| Atom |      | Distance (Å) | Atom |      | Distance (Å) |
|------|------|--------------|------|------|--------------|
| F 1  | F 6  | 2.4736       | F 5  | F 6  | 2.5016       |
|      | F 2  | 2.5774       |      | F 3  | 2.5838       |
|      | F 7  | 2.5898       |      | F 2  | 2.5897       |
|      | F 3  | 2.5925       |      | F 8  | 2.5952       |
|      | F 4  | 2.5996       |      | F 9  | 2.5990       |
|      | F 5  | 2.6108       |      | F 10 | 2.6045       |
|      | F 10 | 2.6229       |      | F 1  | 2.6108       |
|      | F 5  | 2.6382       |      | F 1  | 2.6382       |
|      | F 9  | 3.0021       |      | F 4  | 2.9972       |
|      | F 6  | 3.1199       |      | F 6  | 3.3252       |
| F 2  | F 4  | 2.5008       | F 6  | F 1  | 2.4736       |
|      | F 8  | 2.5564       |      | F 5  | 2.5016       |
|      | F 1  | 2.5774       |      | F 9  | 2.5768       |
|      | F 5  | 2.5897       |      | F 7  | 2.6043       |
|      | F 6  | 2.7512       |      | F 2  | 2.7512       |
|      | F 8  | 3.0141       |      | F 1  | 3.1199       |
|      | F 4  | 3.0884       |      | F 6  | 3.1363       |
|      | F 2  | 3.1129       |      | F 5  | 3.3252       |
|      | F 2  | 3.2350       |      | F 6  | 3.3739       |
|      | F 3  | 3.5947       |      | F 8  | 3.4909       |
| F 3  | F 8  | 2.5296       | F 7  | F 9  | 2.5787       |
|      | F 4  | 2.5800       |      | F 1  | 2.5898       |
|      | F 5  | 2.5838       |      | F 10 | 2.6029       |
|      | F 1  | 2.5925       |      | F 6  | 2.6043       |
|      | F 7  | 2.8806       |      | F 9  | 2.6591       |
|      | F 10 | 2.8947       |      | F 3  | 2.8806       |
|      | F 10 | 2.8994       |      | F 4  | 2.9115       |
|      | F 10 | 3.0361       |      | F 8  | 3.3695       |
|      | F 9  | 3.3151       |      | F 10 | 3.4472       |
|      | F 9  | 3.4378       | F 8  | F 4  | 2.5104       |
|      | F 2  | 3.5947       |      | F 3  | 2.5296       |
| F 4  | F 2  | 2.5008       |      | F 2  | 2.5564       |
|      | F 8  | 2.5105       |      | F 5  | 2.5952       |
|      | F 3  | 2.5800       |      | F 4  | 2.7234       |
|      | F 1  | 2.5996       |      | F 9  | 2.8644       |
|      | F 8  | 2.7234       |      | F 2  | 3.0141       |
|      | F 7  | 2.9115       |      | F 7  | 3.3695       |
|      | F 5  | 2.9972       |      | F 6  | 3.4909       |
|      | F 2  | 3.0884       |      | F 10 | 3.5856       |
|      | F 10 | 3.3346       |      |      |              |

**Table 1.** Continued.

| Atom |      | Distance (Å) | Atom |     | Distance (Å) |
|------|------|--------------|------|-----|--------------|
| F 9  | F 6  | 2.5768       | F 10 | F 7 | 2.6029       |
|      | F 7  | 2.5787       |      | F 5 | 2.6045       |
|      | F 5  | 2.5990       |      | F 9 | 2.6081       |
|      | F 10 | 2.6081       |      | F 1 | 2.6229       |
|      | F 7  | 2.6591       |      | F 3 | 2.8947       |
|      | F 8  | 2.8644       |      | F 3 | 2.8994       |
|      | F 1  | 3.0021       |      | F 3 | 3.0361       |
|      | F 3  | 3.3151       |      | F 4 | 3.3346       |
|      | F 10 | 3.4101       |      | F 9 | 3.4101       |
|      | F 3  | 3.4378       |      | F 7 | 3.4472       |
|      |      |              |      | F 8 | 3.5856       |

**Table 2.** F-F distances ( $d_{F-F} < 3.6 \text{ \AA}$ ) calculated from the optimized structure of  $\text{Ba}_3\text{Al}_2\text{F}_{12}$ .<sup>1</sup>

| Atom |     | Distance (Å) | Atom |     | Distance (Å) |
|------|-----|--------------|------|-----|--------------|
| F 1  | F 6 | 2.4945       | F 5  | F 2 | 2.5215       |
|      | F 6 | 2.4945       |      | F 6 | 2.5420       |
|      | F 2 | 2.5564       |      | F 7 | 2.6031       |
|      | F 2 | 2.5564       |      | F 8 | 2.6201       |
|      | F 1 | 2.5591       |      | F 6 | 2.7238       |
|      | F 8 | 2.6022       |      | F 8 | 2.8516       |
|      | F 8 | 2.6022       |      | F 3 | 3.1849       |
|      | F 7 | 2.6091       |      | F 4 | 3.1895       |
|      | F 7 | 2.6091       | F 6  | F 1 | 2.4945       |
| F 2  | F 5 | 2.5215       |      | F 5 | 2.5420       |
|      | F 5 | 2.5215       |      | F 7 | 2.5496       |
|      | F 1 | 2.5564       |      | F 2 | 2.5589       |
|      | F 1 | 2.5564       |      | F 5 | 2.7238       |
|      | F 6 | 2.5589       |      | F 3 | 3.0575       |
|      | F 6 | 2.5589       |      | F 8 | 3.2090       |
|      | F 8 | 2.5954       |      | F 4 | 3.2169       |
|      | F 8 | 2.5954       |      | F 8 | 3.5262       |
|      | F 4 | 3.3262       |      | F 7 | 3.5626       |
|      | F 4 | 3.5537       | F 7  | F 6 | 2.5496       |
| F 3  | F 3 | 2.8954       |      | F 7 | 2.5551       |
|      | F 7 | 3.0129       |      | F 8 | 2.5859       |
|      | F 7 | 3.0129       |      | F 5 | 2.6031       |
|      | F 6 | 3.0575       |      | F 1 | 2.6091       |
|      | F 6 | 3.0575       |      | F 7 | 2.7931       |
|      | F 5 | 3.1849       |      | F 4 | 2.9424       |
|      | F 5 | 3.1849       |      | F 3 | 3.0129       |
|      | F 8 | 3.2642       |      | F 6 | 3.5626       |
|      | F 8 | 3.2642       | F 8  | F 7 | 2.5859       |
|      | F 8 | 3.3241       |      | F 2 | 2.5954       |
|      | F 8 | 3.3241       |      | F 1 | 2.6022       |
| F 4  | F 7 | 2.9424       |      | F 5 | 2.6201       |
|      | F 7 | 2.9424       |      | F 8 | 2.8208       |
|      | F 4 | 2.9883       |      | F 5 | 2.8516       |
|      | F 5 | 3.1895       |      | F 6 | 3.2090       |
|      | F 5 | 3.1895       |      | F 3 | 3.2642       |
|      | F 6 | 3.2169       |      | F 3 | 3.3241       |
|      | F 6 | 3.2169       |      | F 6 | 3.5262       |
|      | F 2 | 3.3262       |      | F 4 | 3.5295       |
|      | F 8 | 3.5295       |      |     |              |
|      | F 8 | 3.5295       |      |     |              |
|      | F 2 | 3.5537       |      |     |              |

**Table 3.** F-F distances ( $d_{F-F} < 3.6 \text{ \AA}$ ) calculated from the optimized structure of  $\alpha\text{-CaAlF}_5$ .<sup>1</sup>

| Atom |        | Distance ( $\text{\AA}$ ) |
|------|--------|---------------------------|
| F1   | F2     | 2.5206                    |
|      | F2     | 2.5206                    |
|      | F3     | 2.5699                    |
|      | F3     | 2.5699                    |
|      | F3     | 2.5785                    |
|      | F3     | 2.5785                    |
|      | F2     | 2.6970                    |
|      | F2     | 2.6970                    |
|      | F3     | 3.4556                    |
|      | F3     | 3.4556                    |
| F2   | F3     | 2.5142                    |
|      | F1     | 2.5206                    |
|      | F3     | 2.5521                    |
|      | F1     | 2.6970                    |
|      | F2     | 2.7646                    |
|      | F3     | 3.0321                    |
|      | F3     | 3.1362                    |
|      | F3     | 3.1850                    |
|      | F2     | 3.2076                    |
|      | F3     | 3.3356                    |
| F3   | F2     | 2.5142                    |
|      | F2     | 2.5521                    |
|      | F1     | 2.5699                    |
|      | F1     | 2.5785                    |
|      | F2     | 3.0321                    |
|      | F2     | 3.1362                    |
|      | F2     | 3.1850                    |
|      | F2     | 3.3356                    |
|      | F1     | 3.4556                    |
|      | F3     | 3.5076                    |
| F3   | 3.5300 |                           |

## Reference

1 M. Body, C. Legein, J.-Y. Buzaré, G. Silly, P. Blaha, C. Martineau, F. Calvayrac, *J. Phys. Chem. A*, 2007, **111**, 11873-11884.
